# Supplementary material for: Childhood Exposure to Interparental Physical Violence and Adult Cardiovascular Disease
Source: PubMed Central journal article supplement (PMC11662254; doi:10.1001/jamanetworkopen.2024.51806), 2024-12-20

## Supplementary Online Content

Cui C, Liu L, Li H, et al. Childhood exposure to interparental physical violence and adult cardiovascular disease. *JAMA Netw Open*. 2024;7(12):e2451806.

doi:10.1001/jamanetworkopen.2024.51806

**eMethods.** Definition of Depression, and Statistical Methods

**eTable 1.** Comparison of Characteristics Between Original and Complete Data Sets

**eTable 2.** Sensitivity Analysis of Interparental Physical Violence Experience and Incident Cardiovascular Disease, 2011-2020

**eTable 3.** Interparental Physical Violence Experience and Incident Cardiovascular Disease Considering the Competing Risk of Death

**eTable 4.** Subgroup Associations of Interparental Physical Violence Experience and Incident Cardiovascular Disease

**eTable 5.** Association of Interparental Physical Violence Experience and Adult Depressive Symptoms at Baseline, 2011

**eTable 6.** Proportions of the Association Between Childhood Interparental Physical Violence Exposure and Cardiovascular Diseases Attributable to Adult Depressive Symptoms

**eFigure.** Inclusion and Exclusion Flowchart for Participants in the Study

This supplementary material has been provided by the authors to give readers additional information about their work.

## **eMethods.** Definition of Depression, and Statistical Methods

### **Definition of depressive symptoms**

Depressive symptoms were measured using the CES-D short form consisting of 10 items: (1) bothered by little things, (2) had trouble concentrating, (3) felt depressed, (4) everything was an effort, (5) felt hopeful, (6) felt fearful, (7) sleep was restless, (8) felt happy, (9) felt lonely, and (10) could not get going. Response options for each depressive symptom were measured from 0 (rarely or none of the time in the past week) to 3 (most or all of the time in the past week) and summed up ranging from 0 to 30. Items 5 and 8 were reversely scored before summing up.

### **Statistical analysis**

To estimate population-level risks of cardiovascular disease attributable to childhood interparental violence exposure and adult depression, we calculated the average population-attributable fractions (PAFs) and 95% CIs based on Cox proportional hazard regression with the function of AFcoxph using 'AF' R package. Consistent with the HR estimation, PAFs for childhood interparental violence exposure and adult depression were calculated separately using two models: age and sex were adjusted in model 1; age, sex, residence, marriage status, education level, smoking status, current drinking, and relationship with parents were adjusted in model 2. By including different possible orders by which the risk factors could be eliminated from the population, the average PAF estimates average the different attributable fractions from each permutation, which allows partitioning the overall risk into exposure-specific contributions and comparing different risk factors concerning their respective independent impact on the outcome of interest and prevalence of the risk factors. AFcoxph estimates the attributable fraction for a time-to-event outcome under the hypothetical scenario where a binary exposure X is eliminated from the population, developed by Sjolander and Vansteelandt.

$AF = 1 - \frac{1 - S_0(t)}{1 - S(t)}$ , where  $S_0(t)$  denotes the counterfactual survival function for the event if the exposure would have been eliminated from the population at baseline and  $S(t)$  denotes the factual survival function. If Z is sufficient for confounding control, then  $S_0(t)$  can be expressed as  $EZ\{S(t | X = 0, Z)\}$ . The function uses a fitted Cox proportional hazards regression to estimate  $S(t | X = 0, Z)$ , and the marginal sample distribution of Z to approximate the outer expectation.

Percentage of excess risk mediated (PERM) is calculated as the proportion of the indirect effect mediated through the intermediate variable relative to the total effect of the exposure on the outcome. In our analysis, we calculated the PERM as:

$$\text{PERM} = \frac{\text{hazard ratio (age, sex, residence, education level, smoking status, current drinking)} - \text{hazard ratio (age, sex, residence, education level, smoking status, current drinking, depression adjusted)}}{\text{hazard ratio (age, sex, residence, education level, smoking status, current drinking)} - 1}$$

**eTable 1.** Comparison of Characteristics Between Original and Complete Data Sets

|                                            | Original    | Complete <sup>a</sup> | <i>P</i> value <sup>e</sup> |
|--------------------------------------------|-------------|-----------------------|-----------------------------|
| Participants, No.                          | 10424       | 10105                 |                             |
| Age, years                                 | 58.05(9.00) | 58.10(8.99)           | .68                         |
| Male, n (%)                                | 5092(48.8)  | 4749(47.5)            | .05                         |
| Female, n (%)                              | 5332(51.2)  | 5308(52.5)            |                             |
| Rural residence, n (%)                     | 8540(82.0)  | 8278(81.9)            | .90                         |
| Married, n (%)                             | 9378(90.0)  | 9070(89.8)            | .64                         |
| Education, n (%)                           |             |                       | .51                         |
| primary or below                           | 6866(65.9)  | 6706(66.4)            |                             |
| middle school or above                     | 3550(34.1)  | 3399(33.6)            |                             |
| Current smoking, n (%)                     | 3132(31.0)  | 3128(31.0)            | >.99                        |
| Current drinking, n (%)                    | 3677(35.3)  | 3474(34.4)            | .17                         |
| BMI <sup>b</sup> , kg/m <sup>2</sup>       | 23.43(3.78) | 23.43(3.78)           | .94                         |
| Obesity <sup>c</sup> , n (%)               | 888(10.4)   | 887(8.8)              | .98                         |
| Comorbidity, n (%)                         |             |                       |                             |
| hypertension                               | 2077(19.9)  | 2019(20.0)            | .94                         |
| diabetes                                   | 470(4.5)    | 459(4.5)              | .94                         |
| dyslipidemia                               | 718(6.9)    | 703(7.0)              | .87                         |
| Medication use, n (%)                      |             |                       |                             |
| antihypertensive                           | 1461(14.0)  | 1419(14.0)            | .97                         |
| antidiabetic                               | 300(2.9)    | 290(2.9)              | >.99                        |
| lipid lowering                             | 336(3.2)    | 328(3.2)              | .96                         |
| Depressive symptoms <sup>d</sup> , n (%)   | 2371(22.7)  | 2371(23.5)            | .97                         |
| Childhood physical abuse by parents, n (%) | 2985(28.6)  | 2862(28.3)            | .63                         |

Data are presented as the mean (SD) or number (%), as appropriate.

a Complete data was defined as no missing data on covariates of residence, education, relationship with parents, smoking, alcohol.

b BMI was calculated using self-reported weight in kilograms divided by height in meters squared.

c Obesity was defined as BMI  $\geq$ 28.0 kg/m<sup>2</sup> for Chinese population.

d Depressive symptoms was defined as CES-D score  $\geq$ 12.

e *P* value based on ANOVA test or  $\chi^2$  test as appropriate.

**eTable 2.** Sensitivity Analysis of Interparental Physical Violence Experience and Incident Cardiovascular Disease, 2011-2020

|                                  | Sensitivity 1 <sup>d</sup> |         | Sensitivity 2 <sup>e</sup> |         | Sensitivity 3 <sup>f</sup> |         |
|----------------------------------|----------------------------|---------|----------------------------|---------|----------------------------|---------|
|                                  | HR (95% CI)                | P value | HR (95% CI)                | P value | HR (95% CI)                | P value |
| <b>Dichotomous</b>               |                            |         |                            |         |                            |         |
| <b>CVD</b>                       |                            |         |                            |         |                            |         |
| No-exposure                      | Reference                  |         |                            |         |                            |         |
| Exposure <sup>a</sup>            | 1.354(1.187-1.544)         | <.001   | 1.341(1.178-1.527)         | <.001   | 1.382(1.213-1.573)         | <.001   |
| <b>Heart disease<sup>b</sup></b> |                            |         |                            |         |                            |         |
| No-exposure                      | Reference                  |         |                            |         |                            |         |
| Exposure                         | 1.36(1.171-1.579)          | <.001   | 1.332(1.149-1.544)         | <.001   | 1.371(1.182-1.591)         | <.001   |
| <b>Stroke</b>                    |                            |         |                            |         |                            |         |
| No-exposure                      | Reference                  |         |                            |         |                            |         |
| Exposure                         | 1.262(1.002-1.588)         | .048    | 1.26(1.006-1.579)          | .04     | 1.305(1.041-1.635)         | .02     |
| <b>Frequency</b>                 |                            |         |                            |         |                            |         |
| <b>CVD</b>                       |                            |         |                            |         |                            |         |
| None                             | Reference                  |         |                            |         |                            |         |
| Rarely                           | 1.091(0.964-1.235)         | .17     | 1.132(1.002-1.279)         | .046    | 1.087(0.961-1.23)          | .18     |
| Sometimes                        | 1.316(1.132-1.53)          | <.001   | 1.298(1.119-1.506)         | .001    | 1.338(1.152-1.553)         | <.001   |
| Often                            | 1.567(1.213-2.023)         | .001    | 1.608(1.253-2.064)         | <.001   | 1.531(1.169-2.005)         | .002    |
| P for trend <sup>c</sup>         |                            | <.001   |                            | <.001   |                            | <.001   |
| <b>Heart disease</b>             |                            |         |                            |         |                            |         |
| None                             | Reference                  |         |                            |         |                            |         |
| Rarely                           | 1.081(0.938-1.247)         | .28     | 1.124(0.977-1.293)         | .10     | 1.084(0.942-1.248)         | .26     |
| Sometimes                        | 1.298(1.092-1.542)         | .003    | 1.271(1.072-1.507)         | .006    | 1.32(1.112-1.567)          | .002    |
| Often                            | 1.654(1.247-2.194)         | <.001   | 1.659(1.254-2.195)         | <.001   | 1.515(1.119-2.051)         | .007    |
| P for trend                      |                            | <.001   |                            | <.001   |                            | <.001   |
| <b>Stroke</b>                    |                            |         |                            |         |                            |         |
| None                             | Reference                  |         |                            |         |                            |         |
| Rarely                           | 1.1(0.892-1.357)           | .37     | 1.126(0.915-1.385)         | .26     | 1.079(0.875-1.33)          | .48     |
| Sometimes                        | 1.239(0.954-1.609)         | .11     | 1.213(0.937-1.57)          | .14     | 1.248(0.963-1.617)         | .09     |
| Often                            | 1.428(0.904-2.257)         | .13     | 1.543(0.998-2.387)         | .05     | 1.611(1.005-2.583)         | .048    |
| P for trend                      |                            | .03     |                            | .01     |                            | .02     |

Abbreviation: HR, hazard ratio; CI, confidence interval; CVD, cardiovascular disease

a Childhood interparental violence exposure was defined as witnessing interparental violence sometimes or often when participants were aged before 17 years.

b Heart disease included heart attack, angina, coronary heart disease, heart failure, or other heart problems.

c P for trend was calculated using frequency of witnessing interparental violence ranging between none and often as a continuous variable.

- d Sensitivity 1: based on complete data (n=10 105) without missing for covariates. Adjusted for age, sex, residence, education, smoking status, and current drinking.
- e Sensitivity 2: adjusted for age, sex, residence, education, smoking status, current drinking, obesity statue, hypertension, diabetes, dyslipidemia, and uses of medications.
- f Sensitivity 3: age, sex, residence, education, smoking status, and current drinking were weighted by inverse probability of treatment weighting (IPTW).

**eTable 3.** Interparental Physical Violence Experience and Incident Cardiovascular Disease Considering the Competing Risk of Death

|                                  | Model 1 <sup>d</sup> |         | Model 2 <sup>e</sup> |         |
|----------------------------------|----------------------|---------|----------------------|---------|
|                                  | HR (95% CI)          | P value | HR (95% CI)          | P value |
| <b>CVD</b>                       |                      |         |                      |         |
| No-exposure                      | Reference            |         |                      |         |
| Exposure <sup>a</sup> : Cox      | 1.352 (1.188-1.538)  | <.001   | 1.364(1.199-1.552)   | <.001   |
| Exposure: Fine-Gray <sup>b</sup> | 1.346(1.192-1.52)    | <.001   | 1.357(1.201-1.532)   | <.001   |
| <b>Heart disease<sup>c</sup></b> |                      |         |                      |         |
| No-exposure                      | Reference            |         |                      |         |
| Exposure: Cox                    | 1.342 (1.158-1.556)  | <.001   | 1.358(1.172-1.574)   | <.001   |
| Exposure: Fine-Gray              | 1.341(1.163-1.546)   | <.001   | 1.354(1.175-1.561)   | <.001   |
| <b>Stroke</b>                    |                      |         |                      |         |
| No-exposure                      | Reference            |         |                      |         |
| Exposure: Cox                    | 1.279 (1.022-1.601)  | .03     | 1.284(1.026-1.608)   | .03     |
| Exposure: Fine-Gray              | 1.277(1.026-1.59)    | .03     | 1.282(1.03-1.595)    | .03     |

Abbreviation: HR, hazard ratio; CI, confidence interval; CVD, cardiovascular disease

a Childhood interparental violence exposure was defined as witnessing interparental violence sometimes or often when participants were aged before 17 years.

b HR was estimated using Fine-Gray sub-distribution models.

c Heart disease included heart attack, angina, coronary heart disease, heart failure, or other heart problems.

d Model 1: adjusted for age, and sex.

e Model 2: adjusted for age, sex, residence, education, smoking status, and current drinking.

**eTable 4.** Subgroup Associations of Interparental Physical Violence Experience and Incident Cardiovascular Disease

|                                 | CVD                |                          | Heart disease <sup>b</sup> |                          | Stroke             |                          |
|---------------------------------|--------------------|--------------------------|----------------------------|--------------------------|--------------------|--------------------------|
|                                 | HR (95% CI)        | P <sub>interaction</sub> | HR (95% CI)                | P <sub>interaction</sub> | HR (95% CI)        | P <sub>interaction</sub> |
| <b>Sex</b>                      |                    | 0.88                     |                            | 0.80                     |                    | 0.10                     |
| <b>Men</b>                      |                    |                          |                            |                          |                    |                          |
| No-exposure                     | Reference          |                          |                            |                          |                    |                          |
| Exposure <sup>a</sup>           | 1.372(1.124-1.674) |                          | 1.316(1.035-1.673)         |                          | 1.044(0.795-1.371) |                          |
| None                            | Reference          |                          |                            |                          |                    |                          |
| Rarely                          | 1.014(0.854-1.205) |                          | 1.012(0.825-1.241)         |                          | 1.428(1.015-2.008) |                          |
| Sometimes                       | 1.347(1.081-1.679) |                          | 1.328(1.021-1.726)         |                          | 2.127(1.164-3.888) |                          |
| Often                           | 1.513(0.97-2.36)   |                          | 1.272(0.717-2.255)         |                          | 1.196(1.05-1.363)  |                          |
| <b>Women</b>                    |                    |                          |                            |                          |                    |                          |
| No-exposure                     | Reference          |                          |                            |                          |                    |                          |
| Exposure <sup>a</sup>           | 1.351(1.14-1.602)  |                          | 1.376(1.141-1.66)          |                          | 1.056(0.753-1.482) |                          |
| None                            | Reference          |                          |                            |                          |                    |                          |
| Rarely                          | 1.156(0.974-1.374) |                          | 1.141(0.942-1.381)         |                          | 1.125(0.82-1.544)  |                          |
| Sometimes                       | 1.299(1.063-1.587) |                          | 1.277(1.021-1.597)         |                          | 1.051(0.709-1.558) |                          |
| Often                           | 1.6(1.183-2.165)   |                          | 1.762(1.278-2.431)         |                          | 1.13(0.601-2.122)  |                          |
| <b>Physical abuse by parent</b> |                    | 0.33                     |                            | 0.81                     |                    | 0.30                     |
| <b>No-abuse</b>                 |                    |                          |                            |                          |                    |                          |
| No-exposure                     | Reference          |                          |                            |                          |                    |                          |
| Exposure <sup>a</sup>           | 1.405(1.153-1.712) |                          | 1.35(1.077-1.692)          |                          | 1.37(0.971-1.932)  |                          |
| None                            | Reference          |                          |                            |                          |                    |                          |
| Rarely                          | 1.027(0.879-1.2)   |                          | 1.034(0.866-1.234)         |                          | 0.967(0.735-1.273) |                          |
| Sometimes                       | 1.352(1.078-1.695) |                          | 1.256(0.966-1.634)         |                          | 1.374(0.936-2.015) |                          |
| Often                           | 1.622(1.1-2.392)   |                          | 1.717(1.126-2.621)         |                          | 1.329(0.629-2.806) |                          |
| <b>Abuse exposure</b>           |                    |                          |                            |                          |                    |                          |
| No-exposure                     | Reference          |                          |                            |                          |                    |                          |
| Exposure <sup>a</sup>           | 1.242(1.037-1.487) |                          | 1.31(1.066-1.61)           |                          | 1.098(0.804-1.499) |                          |
| None                            | Reference          |                          |                            |                          |                    |                          |
| Rarely                          | 1.122(0.914-1.377) |                          | 1.102(0.868-1.4)           |                          | 1.217(0.878-1.688) |                          |
| Sometimes                       | 1.207(0.982-1.484) |                          | 1.277(1.009-1.617)         |                          | 1.032(0.717-1.486) |                          |
| Often                           | 1.495(1.071-2.088) |                          | 1.543(1.052-2.262)         |                          | 1.557(0.897-2.702) |                          |
| <b>Adult depression</b>         |                    | 0.10                     |                            | 0.11                     |                    | 0.14                     |
| <b>No depression</b>            |                    |                          |                            |                          |                    |                          |
| No-exposure                     | Reference          |                          |                            |                          |                    |                          |
| Exposure <sup>a</sup>           | 1.381(1.159-1.647) |                          | 1.419(1.163-1.732)         |                          | 1.337(0.987-1.812) |                          |
| None                            | Reference          |                          |                            |                          |                    |                          |
| Rarely                          | 1.053(0.897-1.234) |                          | 1.072(0.893-1.286)         |                          | 0.996(0.755-1.314) |                          |



|                       |                    |                    |                    |
|-----------------------|--------------------|--------------------|--------------------|
| Sometimes             | 1.36(1.114-1.659)  | 1.404(1.12-1.758)  | 1.314(0.934-1.85)  |
| Often                 | 1.507(1.054-2.154) | 1.54(1.026-2.311)  | 1.424(0.759-2.671) |
| Depression            |                    |                    |                    |
| No-exposure           | Reference          |                    |                    |
| Exposure <sup>a</sup> | 1.066(0.843-1.347) | 1.046(0.802-1.364) | 0.916(0.6-1.398)   |
| None                  | Reference          |                    |                    |
| Rarely                | 1.142(0.921-1.416) | 1.09(0.85-1.398)   | 1.252(0.886-1.769) |
| Sometimes             | 1.041(0.796-1.361) | 0.983(0.722-1.338) | 0.855(0.519-1.408) |
| Often                 | 1.259(0.804-1.971) | 1.338(0.822-2.178) | 1.3(0.609-2.776)   |

Abbreviation: CVD, cardiovascular disease.

a Childhood interparental violence exposure was defined as witnessing interparental violence sometimes or often when participants were aged before 17 years.

b Heart disease included heart attack, angina, coronary heart disease, heart failure, or other heart problems.

Analyses were adjusted for age, sex, residence, education, smoking status, and current drinking, if not stratified.

**eTable 5.** Association of Interparental Physical Violence Experience and Adult Depressive Symptoms at Baseline, 2011

|                          | Case (prevalence) of depressive symptoms <sup>a</sup> | OR (95% CI)          |                      |
|--------------------------|-------------------------------------------------------|----------------------|----------------------|
|                          |                                                       | Model 1 <sup>c</sup> | Model 2 <sup>d</sup> |
| Dichotomous              |                                                       |                      |                      |
| No-exposure              | 2112 (24.6%)                                          |                      |                      |
| Exposure <sup>b</sup>    | 259 (34.0%)                                           | 1.572(1.339-1.843)   | 1.542(1.31-1.812)    |
| Frequency                |                                                       |                      |                      |
| None                     | 1766 (23.8%)                                          |                      |                      |
| Rarely                   | 346 (29.7%)                                           | 1.465(1.274-1.683)   | 1.429(1.24-1.644)    |
| Sometimes                | 204 (33.9%)                                           | 1.687(1.407-2.016)   | 1.642(1.367-1.968)   |
| Often                    | 55 (34.2%)                                            | 1.565(1.113-2.178)   | 1.555(1.101-2.174)   |
| P for trend <sup>e</sup> |                                                       | <.001                | <.001                |

Abbreviation: OR, Odds ratio; CI, confidence interval

a Depressive symptoms is defined as total CES-D score of 12 or higher.

b Childhood interparental violence exposure was defined as witnessing interparental violence sometimes or often when participants were aged before 17 years.

c Model 1: adjusted for age, and sex.

d Model 2: adjusted for age, sex, residence, education, smoking status, and current drinking.

e P for trend was calculated using frequency of witnessing interparental violence ranging between none and often as a continuous variable.

**eTable 6.** Proportions of the Association Between Childhood Interparental Physical Violence Exposure and Cardiovascular Diseases Attributable to Adult Depressive Symptoms

|                                        | HR (95% CI)        | PERM, % |
|----------------------------------------|--------------------|---------|
| <b>CVD</b>                             |                    |         |
| No-exposure                            | Reference          |         |
| Exposure, multivariate model           | 1.364(1.199-1.552) |         |
| Exposure, depressive symptoms adjusted | 1.256(1.092-1.446) | 11.0    |
| <b>Heart disease</b>                   |                    |         |
| No-exposure                            | Reference          |         |
| Exposure, multivariate model           | 1.358(1.172-1.574) |         |
| Exposure, depressive symptoms adjusted | 1.270(1.083-1.490) | 11.1    |
| <b>Stroke</b>                          |                    |         |
| No-exposure                            | Reference          |         |
| Exposure, multivariate model           | 1.284(1.026-1.608) |         |
| Exposure, depressive symptoms adjusted | 1.171(0.914-1.499) | 15.6    |

Abbreviation: CVD, cardiovascular disease; PERM, percentage of excess risk mediated.

Heart disease included heart attack, angina, coronary heart disease, heart failure, or other heart problems.

Childhood interparental violence exposure was defined as witnessing interparental violence sometimes or often when participants were aged before 17 years.

Multivariate model: adjusted for age, sex, residence, education, smoking status, and current drinking.

**eFigure.** Inclusion and Exclusion Flowchart for Participants in the Study

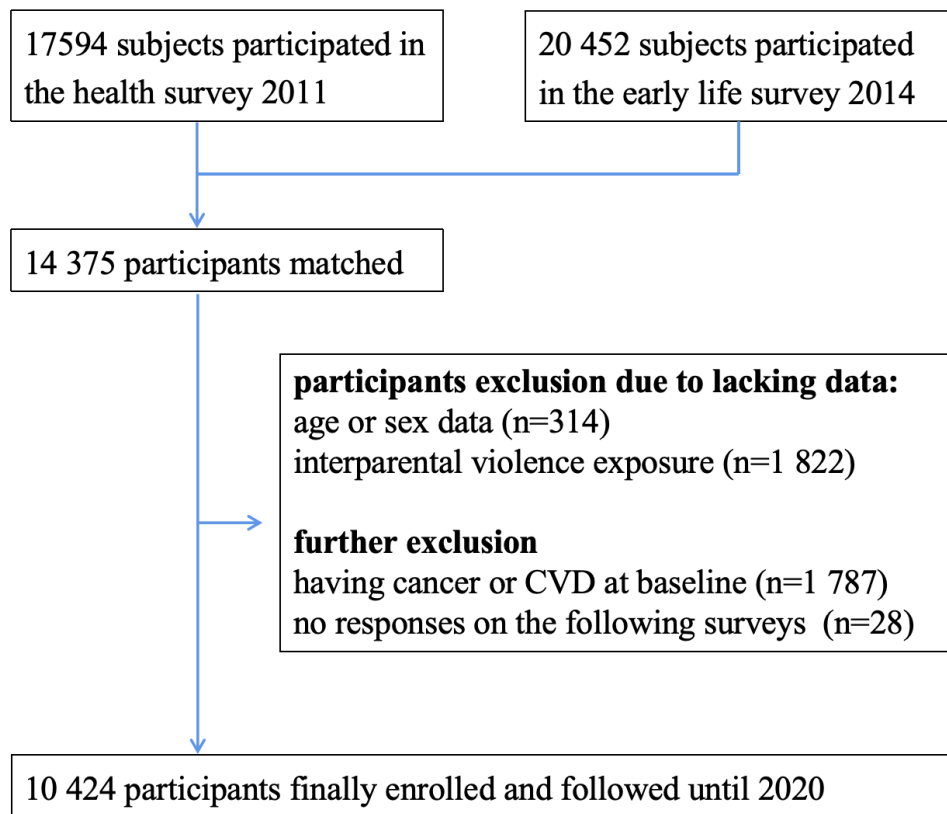

Supplement: jamanetwopen-e2451806-s001.pdf [file jamanetwopen-e2451806-s001.pdf]
