# Supplementary material for: Childhood Exposure to Interparental Physical Violence and Adult Cardiovascular Disease
Source: PubMed Central journal article supplement (PMC11662254; doi:10.1001/jamanetworkopen.2024.51806), 2024-12-20
Supplement: jamanetwopen-e2451806-s002.pdf [file jamanetwopen-e2451806-s002.pdf]

## Data Sharing Statement

Cui. Childhood Exposure to Interparental Physical Violence and Adult Cardiovascular Disease. *JAMA Netw Open*. Published December 20, 2024. doi:10.1001/jamanetworkopen.2024.51806

### Data

**Data available:** Yes

**Data types:** Deidentified participant data

**How to access data:** The final datasets generated for this study are available on reasonable request to the corresponding author ([zhiyuanwu@hsph.harvard.edu](mailto:zhiyuanwu@hsph.harvard.edu)).

**When available:** With publication

### Supporting Documents

**Document types:** None

### Additional Information

**Who can access the data:** Researchers whose proposed use of the data has been approved.

**Types of analyses:** for any purpose or for a specified purpose

**Mechanisms of data availability:** after approval of a proposal
